# Supplementary material
Source: PubMed Central journal article supplement (PMC5155346)
Supplement: supp_tpc.16.00487_TPC2016-00487-RAR2_Supplemental_Data.pdf [file supp_tpc.16.00487_TPC2016-00487-RAR2_Supplemental_Data.pdf]

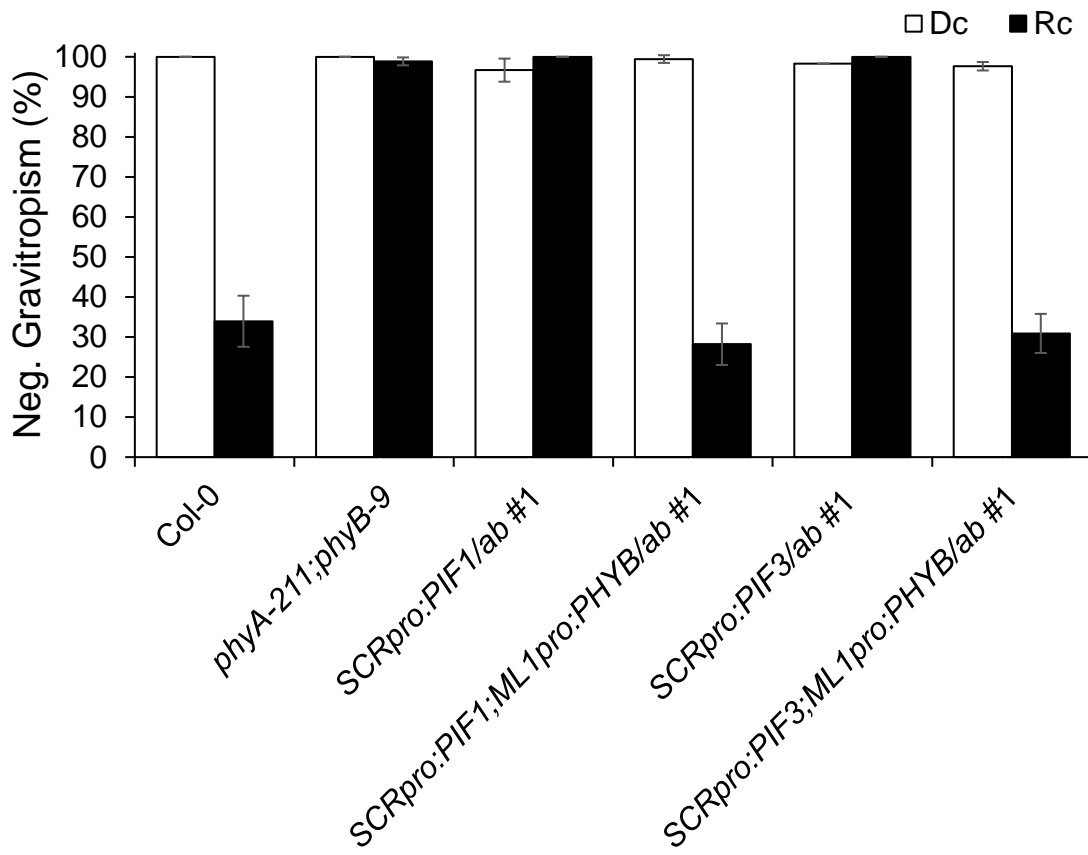

**Supplemental Figure 1.** Epidermal phyB inhibits hypocotyl negative gravitropism in response to red light in *SCRpro:PIF1;ML1pro:PHYB/ab* and *SCRpro:PIF3;ML1pro:PHYB/ab*. Hypocotyl negative gravitropism was quantified by counting seedlings growing within 45 degrees of vertical. Error bars indicate SD, (n = 3, 80 seedlings each).

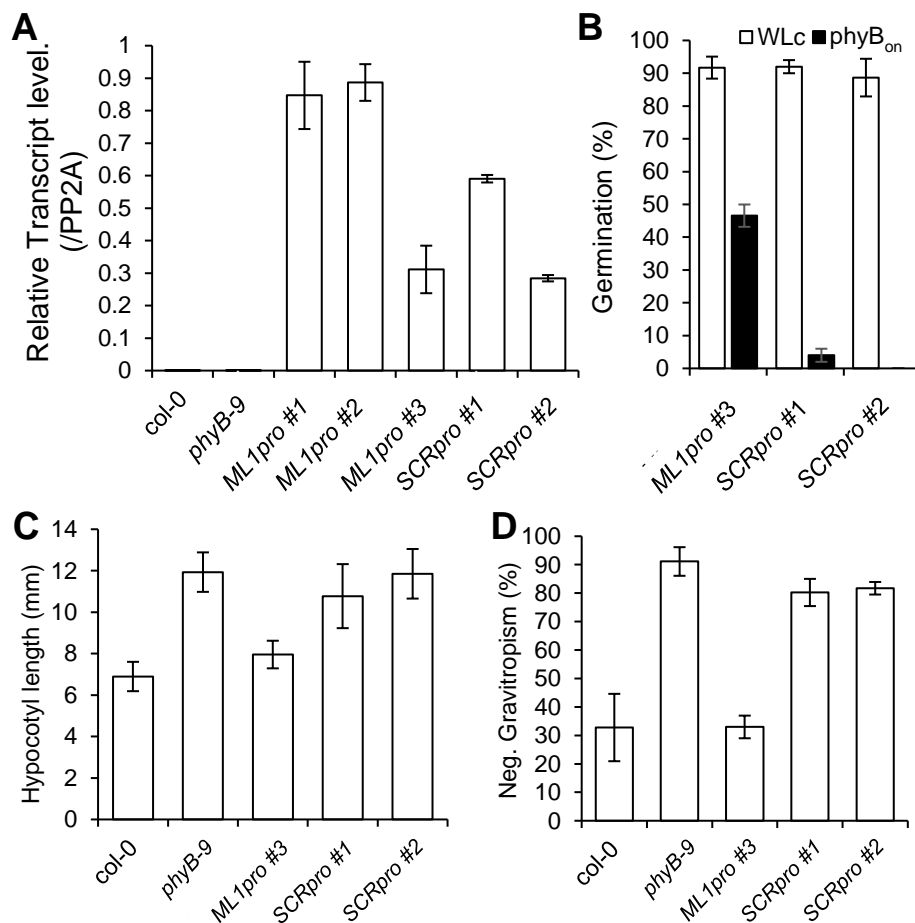

**Supplemental Figure 2.** An *ML1pro* line expressing the lower level of *PHYB-GFP* mRNA than *SCRpro* line can promote light responses. **(A)** The expression levels of *PHYB-GFP* mRNA in three *ML1pro* and two *SCRpro* lines. (SD, n=3 biological replicates). **(B)** Germination frequencies for each tissue-specific phyB line. White bars indicate the continuous white light (WLC) condition and black bars indicate the phyB<sub>on</sub> condition. Error bars indicate SD, (n = 3 biological replicates, 50 seeds each). **(C)** Hypocotyl lengths for the tissue-specific phyB lines under continuous red light (Rc). Error bars indicate SD, (n = 60 seedlings). **(D)** Hypocotyl negative gravitropism for the tissue-specific phyB lines under continuous red light (Rc). Hypocotyl negative gravitropism was quantified by counting seedlings growing within 45 degrees of vertical. Error bars indicate SD, (n = 3, 60 seedlings each).

**Supplemental Table 1.** List of primers.

| promoter cloning primers |                                                |
|--------------------------|------------------------------------------------|
| Primer Name              | Sequence                                       |
| PHYBpro-F(HindIII)       | 5'-GATCAAGCTTTCAGTGGCACGTGGTAAATTACTGG-3'      |
| PHYBpro-R(XbaI)          | 5'-GATCTCTAGACGCCGTTTGATTTTGAATTTGAGAAAATTC-3' |
| ML1pro-F(HindIII)        | 5'-GATCAAGCTTTCGAACCAAGAGATATTGGGTTGCTAC-3'    |
| ML1pro-R(BamHI)          | 5'-GATCGGATCCGGCTAATATGAACAAACATGCAATATTTGC-3' |
| ML1pro-F(BamHI)          | 5'-GATCTCTAGAGGATCCGTTTTATATTTTTTCATGATCTAC-3' |
| ML1pro-R(SpeI)           | 5'-GATCACTAGTCGATGATGATGGATGCCTATCAATTTTTGG-3' |
| CO2pro-F(NoEnz)          | 5'-GATCTAACTCCATTATTACGACTGTGCCACTC-3'         |
| CO2pro-R(XbaI)           | 5'-GCTCTAGATATCGTTATTAAGTAGGGTTCCTTGAATTTTC-3' |
| SCRpro-F(HindIII)        | 5'-GATCAAGCTTCTATTCAAATATGGACTTGGAGAAAGAC-3'   |
| SCRpro-R(XbaI)           | 5'-GATCTCTAGACGGAGATTGAAGGGTTGTTGGTCGTG-3'     |
| Sultr1pro-F(HindIII)     | 5'-GATCAAGCTTGAAGCAAAGTAGTACTATGAGATAG-3'      |
| Sultr1pro-R(XbaI)        | 5'-GATCTCTAGATGCTATGTGTGTTTTGTAGCAAAC-3'       |
| CER6pro-F(HindIII)       | 5'-GATCAAGCTTGTCAATCCAAAGAAATCAGAGAAGT-3'      |
| CER6pro-R(XbaI)          | 5'-GATCTCTAGACCGTCGGAGAGTTTTAATGTATAATTG-3'    |
| CDS cloning primers      |                                                |
| Primer Name              | Sequence                                       |
| PHYB-F(XbaI)             | 5'-GATCTCTAGGATGGTTTCCGGAGTCGGGGGTAG-3'        |
| PHYB-F(BamHI)            | 5'-GATCGGATCCATGGTTTCCGGAGTCGGGGGTAG-3'        |
| PHYB-R(BamHI)            | 5'-GATCGGATCCCATATGGCATCATCAGCATCATGTC-3'      |
| PIF1-F(AvrII)            | 5'-GAGACCTAGGATGCATCATTTTTGTCCCT-3'            |
| PIF1-R(BclI)             | 5'-GAGATGATCAAACCTGTTGTGTGGTTTCCGTGA-3'        |
| PIF3-F(SpeI)             | 5'-AGAGAGCTCAAATGCCTCTGTTTGAGCTTTTC-3'         |
| PIF3-R(BamHI)            | 5'-GAGAGGATCCACGACGATCCACAAAAGTGA-3'           |
| qPCR primers             |                                                |
| Primer Name              | Sequence                                       |
| GFP RT-F                 | 5'-CCACAACGTATACATCACGGCA-3'                   |
| GFP RT-R                 | 5'-CCCAGCAGCTGTTACAAACTCA-3'                   |
| PP2A LP                  | 5'-TATCGGATGACGATTCTTCGTGCAG-3'                |
| PP2A RP                  | 5'-GCTTGGTCGACTATCGGAATGAGAG-3'                |
